# Supplementary material for: Novel NDUFA13 Mutations Associated with OXPHOS Deficiency and Leigh Syndrome: A Second Family Report
Source: MDPI journal article supplement (doi:10.3390/genes11080855), 2020-07-26
Supplement: s1 [file s1]

## Supplementary Material

### Novel *NDUFA13* mutations associated with OXPHOS deficiency and Leigh syndrome: A second family report.

Adrián González-Quintana <sup>1,2</sup>, Inés García-Consuegra <sup>1,2</sup>, Amaya Belanger-Quintana <sup>3</sup>, Pablo Serrano-Lorenzo <sup>1</sup>, Alejandro Lucia <sup>4</sup>, Alberto Blázquez <sup>1,2</sup>, Jorge Docampo <sup>1,2</sup>, Cristina Ugalde <sup>1,2</sup>, María Moran <sup>1,2</sup>, Joaquín Arenas <sup>1,2</sup>, Miguel A. Martín <sup>1,2,\*</sup>.

**Supplementary Table 1:** Next generation sequencing “OXPHOS panel”. Structural subunits and assembly factor genes of OXPHOS system included:

|               |               |              |               |                |                |                |                |               |                |                 |
|---------------|---------------|--------------|---------------|----------------|----------------|----------------|----------------|---------------|----------------|-----------------|
| <i>ACAD9</i>  | <i>ATP5J</i>  | <i>COA1</i>  | <i>COX18</i>  | <i>COX7A1</i>  | <i>LYRM7</i>   | <i>NDUFA8</i>  | <i>NDUFB11</i> | <i>NDUFS2</i> | <i>PET112</i>  | <i>TMEM126B</i> |
| <i>ATP5A1</i> | <i>ATP5J2</i> | <i>COA3</i>  | <i>COX19</i>  | <i>COX7A2</i>  | <i>NDUFA1</i>  | <i>NDUFA9</i>  | <i>NDUFB2</i>  | <i>NDUFS3</i> | <i>SCO1</i>    | <i>TMEM70</i>   |
| <i>ATP5B</i>  | <i>ATP5L</i>  | <i>COA4</i>  | <i>COX20</i>  | <i>COX7B</i>   | <i>NDUFA10</i> | <i>NDUFAB1</i> | <i>NDUFB3</i>  | <i>NDUFS4</i> | <i>SCO2</i>    | <i>TTC19</i>    |
| <i>ATP5C1</i> | <i>ATP5L2</i> | <i>COA5</i>  | <i>COX4I1</i> | <i>COX7B2</i>  | <i>NDUFA11</i> | <i>NDUFAB1</i> | <i>NDUFB4</i>  | <i>NDUFS5</i> | <i>SDHA</i>    | <i>UQCC1</i>    |
| <i>ATP5D</i>  | <i>ATP5O</i>  | <i>COA6</i>  | <i>COX4I2</i> | <i>COX7C</i>   | <i>NDUFA12</i> | <i>NDUFAB2</i> | <i>NDUFB5</i>  | <i>NDUFS6</i> | <i>SDHAF1</i>  | <i>UQCC2</i>    |
| <i>ATP5E</i>  | <i>ATP5S</i>  | <i>COA7</i>  | <i>COX5A</i>  | <i>COX8A</i>   | <i>NDUFA13</i> | <i>NDUFAB3</i> | <i>NDUFB6</i>  | <i>NDUFS7</i> | <i>SDHAF2</i>  | <i>UQCR10</i>   |
| <i>ATP5F1</i> | <i>ATPAF1</i> | <i>COX10</i> | <i>COX5B</i>  | <i>COX8C</i>   | <i>NDUFA2</i>  | <i>NDUFAB4</i> | <i>NDUFB7</i>  | <i>NDUFS8</i> | <i>SDHB</i>    | <i>UQCR11</i>   |
| <i>ATP5G1</i> | <i>ATPAF2</i> | <i>COX11</i> | <i>COX6A1</i> | <i>CYC1</i>    | <i>NDUFA3</i>  | <i>NDUFAB5</i> | <i>NDUFB8</i>  | <i>NDUFV1</i> | <i>SDHC</i>    | <i>UQCRB</i>    |
| <i>ATP5G2</i> | <i>ATPIF1</i> | <i>COX14</i> | <i>COX6A2</i> | <i>ECSIT</i>   | <i>NDUFA4</i>  | <i>NDUFAB6</i> | <i>NDUFB9</i>  | <i>NDUFV2</i> | <i>SDHD</i>    | <i>UQCRC1</i>   |
| <i>ATP5G3</i> | <i>BCS1L</i>  | <i>COX15</i> | <i>COX6B1</i> | <i>FASTKD2</i> | <i>NDUFA5</i>  | <i>NDUFAB7</i> | <i>NDUFC1</i>  | <i>NDUFV3</i> | <i>SURF1</i>   | <i>UQCRC2</i>   |
| <i>ATP5H</i>  | <i>CMC1</i>   | <i>COX16</i> | <i>COX6B2</i> | <i>FOXRED1</i> | <i>NDUFA6</i>  | <i>NDUFB1</i>  | <i>NDUFC2</i>  | <i>NUBPL</i>  | <i>TACO1</i>   | <i>UQCRFS1</i>  |
| <i>ATP5I</i>  | <i>CMC2</i>   | <i>COX17</i> | <i>COX6C</i>  | <i>LRPPRC</i>  | <i>NDUFA7</i>  | <i>NDUFB10</i> | <i>NDUFS1</i>  | <i>OXA1L</i>  | <i>TIMMDC1</i> | <i>UQCRH</i>    |
|               |               |              |               |                |                |                |                |               |                | <i>UQCRQ</i>    |

Selection of these genes was carried out by literature and databases search in November 2015.

**Supplementary Table 2:** Amplification PCR primers for exon 2 and exon 3 of the *NDUFA13* gene.

| Exon | Foward Primer         | Reverse Primer        |
|------|-----------------------|-----------------------|
| 2    | TGTCACAGTCCAAGCAGCCT  | CAACAGCGGAATGCTACAGG  |
| 3    | GAAAGTAGAAAGCCAACAGTC | AACTCCTAGCTTTTCTCTTGC |

Thermocycling program: I) 5 minutes at 95 °C II) 30 cycles: 30 seconds at 94 °C, 30 seconds at 58 °C and 40 seconds at 72 °C III) 10 minutes of 72 °C
